# Supplementary material for: E Unibus Plurum: Genomic Analysis of an Experimentally Evolved Polymorphism in Escherichia coli
Source: PubMed Central journal article supplement (PMC2763269; doi:10.1371/journal.pgen.1000713), 2009-11-06
Supplement: pgen.1000713.s004.pdf [file pgen.1000713.s004.pdf]

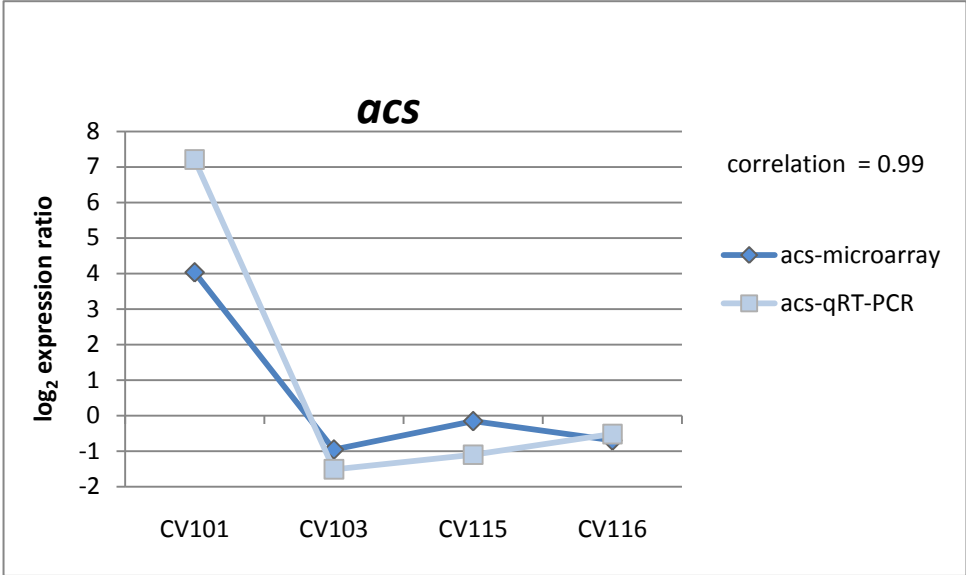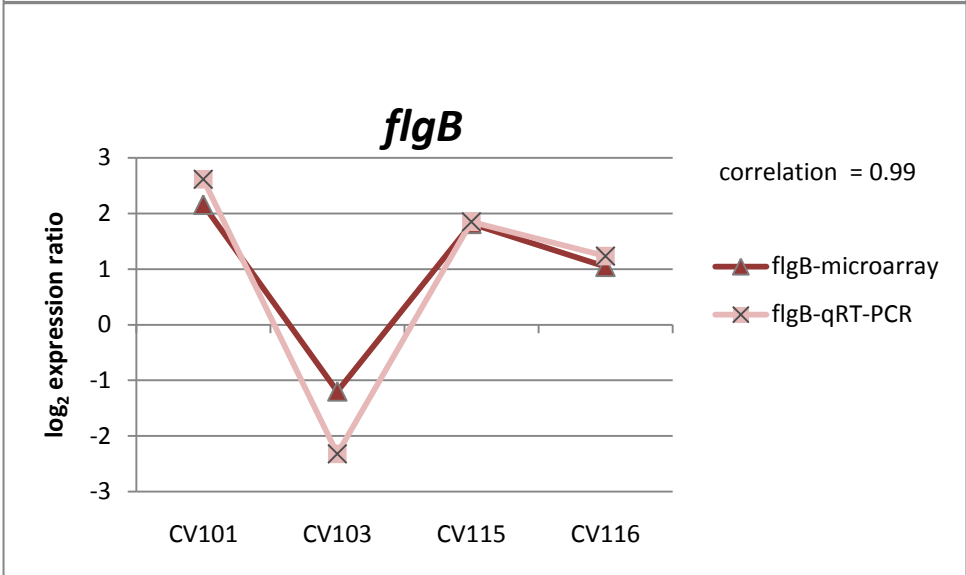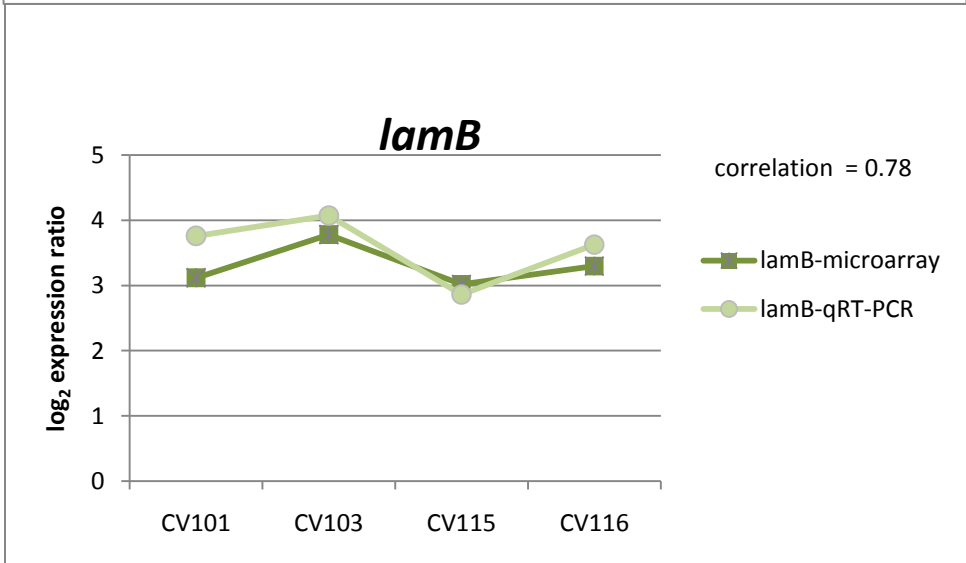

**Supplementary Figure 4. qRT-PCR results for lamB, flgB, and acs.** Mean expression vectors for  $\log_2$  ratios were plotted for the microarray and qRT-PCR values for each gene and the Pearson correlation coefficient between techniques was calculated as in Larkin et al. 2005 [112]. The correlation coefficient for all three genes were high (0.78-0.99) indicating a strong correspondence between microarray and qRT-PCR transcript measurements.
