# Supplementary material for: E Unibus Plurum: Genomic Analysis of an Experimentally Evolved Polymorphism in Escherichia coli
Source: PubMed Central journal article supplement (PMC2763269; doi:10.1371/journal.pgen.1000713), 2009-11-06
Supplement: pgen.1000713.s005.pdf [file pgen.1000713.s005.pdf]

**Supplementary Table 1.** Top 90 significant genes by 1-class SAM for evolved isolates grown individually.

| ID    | gene           | Log <sub>2</sub><br>CV101/<br>JA122 | Log <sub>2</sub><br>CV103/<br>JA122 | Log <sub>2</sub><br>CV115/<br>JA122 | Log <sub>2</sub><br>CV116/<br>JA122 | gene product                                                                             | Transcription<br>Unit  | MultiFun category                                                                                                                        |
|-------|----------------|-------------------------------------|-------------------------------------|-------------------------------------|-------------------------------------|------------------------------------------------------------------------------------------|------------------------|------------------------------------------------------------------------------------------------------------------------------------------|
| b4036 | <i>lamB</i>    | 3.6                                 | 5.1                                 | 2.9                                 | 2.2                                 | maltose outer membrane porin (maltoporin)                                                | malK-lamB-malM (malKp) | transport; (The Outer Membrane Porin (OMP) Functional Superfamily); The Sugar Porin (SP) Family                                          |
| b2148 | <i>mgIC</i>    | 3.5                                 | 3.1                                 | 2.6                                 | 2.5                                 | membrane component of an ABC superfamily methyl-galactoside transporter                  | mgIBAC (mgIBp)         | metabolism; carbon utilization; transport; The ATP-binding Cassette (ABC) Superfamily                                                    |
| b3902 | <i>rhaD</i>    | 3.4                                 | 3.4                                 | 2.7                                 | 2.7                                 | rhamnulose-1-phosphate aldolase                                                          | rhaBAD (rhaBp)         | Metabolism; carbon utilization;                                                                                                          |
| b2149 | <i>mgIA</i>    | 4.5                                 | 3.9                                 | 3.6                                 | 3.3                                 | fused methyl-galactoside transporter subunits of ABC superfamily: ATP-binding components | mgIBAC (mgIBp)         | metabolism; carbon utilization; The ATP-binding Cassette (ABC) Superfamily                                                               |
| b2150 | <i>mgIB</i>    | 4.1                                 | 4.1                                 | 3.6                                 | 2.7                                 | periplasmic-binding component of an ABC superfamily methyl-galactoside transporter       | mgIBAC (mgIBp)         | Metabolism; carbon utilization; chaperoning, folding, transport; Primary Active Transporters; The ATP-binding Cassette (ABC) Superfamily |
| b1804 | <i>rnd</i>     | 0.6                                 | 0.6                                 | 0.6                                 | 0.7                                 | ribonuclease D                                                                           | rnd                    | metabolism; macromolecule degradation; information transfer; RNA modification                                                            |
| b0589 | <i>fepG</i>    | 1.0                                 | 1.0                                 | 0.7                                 | 1.0                                 | membrane component of an ABC superfamily iron-enterobactin transporter                   | fepDGC (fepDp1)        | transport; The ATP-binding Cassette (ABC) Superfamily                                                                                    |
| b3505 | <i>insH-11</i> | 0.7                                 | 1.0                                 | 1.2                                 | 1.2                                 | IS5 transposase                                                                          | insH-11                | Extrachromosomal; transposon related                                                                                                     |
| b3218 | <i>insH-10</i> | 0.7                                 | 0.9                                 | 1.1                                 | 1.1                                 | IS5 transposase                                                                          | insH-10                | Extrachromosomal; transposon related                                                                                                     |
| b0656 | <i>insH-3</i>  | 0.6                                 | 0.9                                 | 1.0                                 | 1.0                                 | IS5 transposase                                                                          | insH-3                 | Extrachromosomal; transposon related                                                                                                     |
| b0552 | <i>insH-2</i>  | 0.7                                 | 0.8                                 | 1.0                                 | 1.1                                 | IS5 transposase                                                                          | insH-2                 | Extrachromosomal; prophage genes; transposon related                                                                                     |
| b2192 | <i>insH-8</i>  | 0.6                                 | 0.9                                 | 1.0                                 | 1.1                                 | IS5 transposase                                                                          | insH-8                 | Extrachromosomal; transposon related                                                                                                     |
| b1370 | <i>insH-5</i>  | 0.7                                 | 0.9                                 | 1.0                                 | 1.1                                 | IS5 transposase                                                                          | insH-5                 | Extrachromosomal; prophage genes; transposon related                                                                                     |
| b1331 | <i>insH-4</i>  | 0.6                                 | 0.9                                 | 1.0                                 | 1.1                                 | IS5 transposase                                                                          | insH-4                 | Extrachromosomal; transposon related                                                                                                     |
| b2030 | <i>insH-7</i>  | 0.6                                 | 0.9                                 | 1.1                                 | 1.1                                 | IS5 transposase                                                                          | insH-7                 | Extrachromosomal; transposon related                                                                                                     |
| b2982 | <i>insH-9</i>  | 0.6                                 | 0.9                                 | 1.1                                 | 1.2                                 | IS5 transposase                                                                          | insH-9                 | Extrachromosomal; transposon related                                                                                                     |
| b0259 | <i>insH-1</i>  | 0.7                                 | 0.9                                 | 1.1                                 | 1.1                                 | IS5 transposase                                                                          | insH-1                 | Extrachromosomal; prophage genes; transposon related                                                                                     |

|       |               |      |      |      |      |                                                                                      |                        |                                                                                                      |
|-------|---------------|------|------|------|------|--------------------------------------------------------------------------------------|------------------------|------------------------------------------------------------------------------------------------------|
| b1994 | <i>insH-6</i> | 0.6  | 0.9  | 1.1  | 1.1  | IS5 transposase                                                                      | insH-6                 | Extrachromosomal; transposon related                                                                 |
| b2289 | <i>lrhA</i>   | 0.9  | 0.9  | 1.1  | 1.1  | DNA-binding transcriptional repressor of flagellar, motility and chemotaxis genes    | lrhA                   | metabolism; energy metabolism, aerobic respiration, regulation; transcriptional level; repressor     |
| b2147 | <i>yeiA</i>   | 1.4  | 1.7  | 1.6  | 1.4  | predicted oxidoreductase                                                             | yeiAT (yeiTp)          | metabolism; central intermediary metabolism; unassigned reversible reactions                         |
| b2151 | <i>galS</i>   | 1.9  | 2.0  | 2.0  | 2.2  | DNA-binding transcriptional repressor                                                | galS                   | metabolism; carbon utilization; regulation; transcriptional level; repressor                         |
| b1042 | <i>csgA</i>   | -2.9 | -2.7 | -4.0 | -4.3 | cryptic curlin major subunit                                                         | csgBAC (csgBp)         | metabolism; macromolecules (cellular constituent) biosynthesis; glycoprotein, cell structure; pilus, |
| b1923 | <i>fliC</i>   | -2.6 | -2.7 | -3.5 | -3.8 | flagellar filament structural protein (flagellin)                                    | fliC                   | metabolism; macromolecules (cellular constituent) biosynthesis; flagella                             |
| b0897 | <i>ycaC</i>   | -2.9 | -1.8 | -3.6 | -3.6 | predicted hydrolase                                                                  | ycaC                   | Metabolism; carbon utilization; amino acids                                                          |
| b1444 | <i>ydcW</i>   | -1.4 | -2.6 | -3.3 | -3.3 | medium chain aldehyde dehydrogenase                                                  | ydcW                   |                                                                                                      |
| b3555 | <i>yiaG</i>   | -2.0 | -0.6 | -2.4 | -2.4 | predicted transcriptional regulator                                                  | yiaG                   | regulation; transcriptional level                                                                    |
| b2665 | <i>ygaU</i>   | -2.5 | -1.0 | -2.7 | -2.6 | predicted protein                                                                    | ygaU                   |                                                                                                      |
| b2080 | <i>yegP</i>   | -2.4 | -1.1 | -2.6 | -2.4 | predicted protein                                                                    | yegP                   |                                                                                                      |
| b1896 | <i>otsA</i>   | -2.4 | -0.7 | -2.6 | -2.4 | trehalose-6-phosphate synthase                                                       | otsBA (otsBp)          | metabolism; central intermediary metabolism; glucose metabolism,                                     |
| b1051 | <i>msyB</i>   | -2.3 | -0.8 | -2.4 | -2.3 | predicted protein                                                                    | msyB                   | transport; substrate; protein                                                                        |
| b0812 | <i>dps</i>    | -2.8 | -2.2 | -2.9 | -2.4 | Fe-binding and storage protein                                                       | dps                    | Information transfer; protein related; cell processes; adaptation to stress; starvation response     |
| b4376 | <i>osmY</i>   | -2.3 | -1.8 | -2.8 | -3.0 | periplasmic protein                                                                  | osmY                   | Cell processes; adaptation to stress; osmotic pressure                                               |
| b3447 | <i>ggt</i>    | -2.2 | -1.9 | -2.9 | -2.9 | gamma-glutamyltranspeptidase                                                         | ggt                    | metabolism; macromolecules (cellular constituent) biosynthesis; thioredoxin, glutaredoxin            |
| b1258 | <i>yciF</i>   | -2.6 | -1.5 | -2.8 | -2.6 | conserved protein                                                                    | yciGFE (yciGp)         |                                                                                                      |
| b1885 | <i>tap</i>    | -1.5 | -2.0 | -2.8 | -2.9 | methyl-accepting protein IV                                                          | tar-tap-cheRBYZ (tarp) | regulation; posttranscriptional; cell processes; motility (incl.                                     |
| b1443 | <i>ydcV</i>   | -1.4 | -2.4 | -2.5 | -2.8 | membrane component of an ABC superfamily predicted spermidine/putrescine transporter | ydcSTUV                | transport; The ATP-binding Cassette (ABC) Superfamily                                                |
| b1040 | <i>csgD</i>   | -1.7 | -1.8 | -2.3 | -2.6 | DNA-binding transcriptional regulator of adhesion determinants                       | csgDEFG (csgDp2)       | Information transfer; RNA related; transcription related, activator                                  |

|       |             |      |      |      |      |                                                                           |                   |                                                                                                                                                       |
|-------|-------------|------|------|------|------|---------------------------------------------------------------------------|-------------------|-------------------------------------------------------------------------------------------------------------------------------------------------------|
| b1967 | <i>hchA</i> | -1.9 | -1.9 | -2.8 | -2.0 | Hsp31 molecular chaperone                                                 | hchA              |                                                                                                                                                       |
| b2924 | <i>mscS</i> | -2.0 | -1.7 | -1.9 | -2.1 | component of the MscS mechanosensitive channel                            | mscS              | transport; Channel-type Transporters; The Small Conductance Mechanosensitive Ion Channel (MscS) Family                                                |
| b1038 | <i>csgF</i> | -1.8 | -1.8 | -2.1 | -2.0 | predicted transport protein                                               | csgDEFG (csgDp2)  | transport; Putative uncharacterized transport protein, cell structure; pilus, curli subunit                                                           |
| b1480 | <i>sra</i>  | -2.0 | -1.7 | -2.3 | -2.3 | 30S ribosomal subunit protein S22                                         | sraA (sraAp)      | Information transfer; protein related; ribosomal proteins                                                                                             |
| b1482 | <i>osmC</i> | -2.1 | -1.9 | -2.2 | -2.1 | osmotically inducible, stress-inducible membrane protein                  | osmC              | Cell processes; adaptation to stress; osmotic pressure                                                                                                |
| b2465 | <i>tktB</i> | -1.9 | -1.3 | -2.5 | -2.3 | transketolase 2, thiamin-binding                                          | tktB              | metabolism; carbon utilization; central intermediary metabolism; pentose phosphate shunt, non-oxidative branch; nucleotide and nucleoside conversions |
| b2266 | <i>elaB</i> | -1.8 | -1.3 | -2.3 | -2.2 | conserved protein                                                         | elaB              |                                                                                                                                                       |
| b2097 | <i>fbaB</i> | -1.8 | -1.2 | -2.3 | -2.1 | fructose-bisphosphate aldolase class I                                    | fbaB              | metabolism; energy metabolism, carbon; glycolysis                                                                                                     |
| b1004 | <i>wrbA</i> | -2.0 | -1.4 | -2.3 | -2.0 | predicted flavoprotein in Trp regulation                                  | wrbA-yccJ (wrbAp) | Metabolism; building block biosynthesis; amino acids; tryptophan                                                                                      |
| b1732 | <i>katE</i> | -1.9 | -1.5 | -2.2 | -2.1 | hydroperoxidase HPII(III) (catalase)                                      | katE              | Cell processes; protection; detoxification (xenobiotic metabolism)                                                                                    |
| b0871 | <i>poxB</i> | -1.6 | -2.7 | -2.0 | -1.9 | pyruvate dehydrogenase (pyruvate oxidase), thiamin-dependent, FAD-binding | ltaE-poxB-ybjT    | metabolism; carbon utilization; central intermediary metabolism; pyruvate oxidation                                                                   |
| b1478 | <i>adhP</i> | -1.3 | -2.2 | -1.8 | -1.7 | alcohol dehydrogenase, 1-propanol preferring                              | adhP              | metabolism; energy metabolism, carbon; anaerobic respiration                                                                                          |
| b1037 | <i>csgG</i> | -1.6 | -1.9 | -1.7 | -1.4 | outer membrane channel lipoprotein                                        | csgDEFG (csgDp2)  | transport; Putative uncharacterized transport protein, cell structure; pilus, curli subunit                                                           |
| b1431 | <i>ydcL</i> | -1.5 | -1.5 | -1.6 | -1.8 | predicted lipoprotein                                                     | ydcL              |                                                                                                                                                       |
| b1490 | <i>yddV</i> | -1.5 | -1.5 | -1.5 | -1.8 | predicted diguanylate cyclase                                             | yddV-dos          |                                                                                                                                                       |
| b1197 | <i>treA</i> | -1.6 | -1.3 | -1.8 | -1.9 | periplasmic trehalase                                                     | treA              | metabolism; central intermediary metabolism; adaptation to stress; osmotic pressure                                                                   |
| b1101 | <i>ptsG</i> | -1.8 | -1.4 | -1.7 | -1.4 | PTS system glucose-specific IICB component                                | ptsG              | Metabolism; carbon utilization; regulation; type of regulation; posttranscriptional; transport                                                        |
| b1259 | <i>yciG</i> | -1.7 | -1.5 | -1.8 | -1.5 | predicted protein                                                         | yciGFE (yicGp)    |                                                                                                                                                       |
| b0753 | <i>ybgS</i> | -1.9 | -1.2 | -1.9 | -1.7 | conserved protein                                                         | ybgS              |                                                                                                                                                       |
| b3515 | <i>gadW</i> | -1.6 | -1.3 | -2.1 | -1.7 | DNA-binding transcriptional activator                                     | gadXW (gadXp)     | Information transfer; RNA related; transcription related, regulation; activator                                                                       |
| b1710 | <i>btuE</i> | -1.5 | -1.1 | -2.0 | -1.8 | predicted glutathione                                                     | btuCED            | Metabolism; building block biosynthesis; cobalamin (Vitamin                                                                                           |

|       |             |      |      |      |      |                                                                                                                     |                    |                                                                                                                                  |
|-------|-------------|------|------|------|------|---------------------------------------------------------------------------------------------------------------------|--------------------|----------------------------------------------------------------------------------------------------------------------------------|
|       |             |      |      |      |      | peroxidase                                                                                                          |                    | B12), transport; Primary Active Transporters; The ATP-binding Cassette (ABC) Superfamily                                         |
| b1810 | <i>yoaC</i> | -1.8 | -0.9 | -1.8 | -2.1 | predicted protein                                                                                                   | yoaC               |                                                                                                                                  |
| b1050 | <i>yceK</i> | -1.9 | -0.9 | -2.4 | -1.8 | predicted lipoprotein                                                                                               | yceK               |                                                                                                                                  |
| b2464 | <i>talA</i> | -1.9 | -1.0 | -2.1 | -1.8 | transaldolase A                                                                                                     | talA               | metabolism; central intermediary metabolism; pentose phosphate shunt, non-oxidative branch                                       |
| b0453 | <i>ybaY</i> | -1.9 | -1.0 | -2.1 | -2.0 | predicted outer membrane lipoprotein                                                                                | ybaY               | metabolism; macromolecules biosynthesis; lipoprotein; glycoprotein                                                               |
| b1836 | <i>yebV</i> | -1.4 | -0.7 | -2.2 | -1.9 | predicted protein                                                                                                   | yebV               |                                                                                                                                  |
| b1064 | <i>grxB</i> | -1.6 | -1.3 | -1.6 | -1.0 | glutaredoxin 2 (Grx2)                                                                                               | grxB               | metabolism; macromolecules (cellular constituent) biosynthesis; large molecule carriers; thioredoxin, glutaredoxin               |
| b1003 | <i>yccJ</i> | -1.3 | -1.1 | -1.7 | -1.4 | predicted protein                                                                                                   | wrbA-yccJ (wrbAp)  |                                                                                                                                  |
| b1241 | <i>adhE</i> | -1.4 | -0.7 | -1.2 | -1.6 | fused acetaldehyde-CoA dehydrogenase and iron-dependent alcohol dehydrogenase and pyruvate-formate lyase deactivase | adhE               | metabolism; energy metabolism, carbon; fermentation                                                                              |
| b1709 | <i>btuD</i> | -1.1 | -0.6 | -1.7 | -1.3 | vitamin B12 transporter subunit : ATP-binding component of ABC superfamily                                          | btuCED             | Metabolism; building block biosynthesis; cobalamin (Vitamin B12), transport; The ATP-binding Cassette (ABC) Superfamily          |
| b1661 | <i>cfa</i>  | -1.5 | -0.6 | -1.6 | -1.3 | cyclopropane fatty acyl phospholipid synthase                                                                       | cfa                | Metabolism; building block biosynthesis; fatty acid and phosphatidic acid                                                        |
| b2594 | <i>rluD</i> | -0.4 | -0.5 | -0.6 | -0.6 | 23S rRNA pseudouridine synthase                                                                                     | rluD-yfiH          | Information transfer; RNA related; RNA modification                                                                              |
| b1049 | <i>mdoH</i> | -0.4 | -0.7 | -0.8 | -0.6 | glycosyl transferase                                                                                                | mdoGH (mdoGp1)     | Cell processes; adaptation to stress; osmotic pressure                                                                           |
| b1641 | <i>slyB</i> | -0.8 | -1.3 | -0.8 | -0.7 | outer membrane lipoprotein                                                                                          | slyB               | Cell structure; membrane                                                                                                         |
| b4384 | <i>deoD</i> | -0.7 | -0.9 | -0.9 | -0.7 | purine-nucleoside phosphorylase                                                                                     | deoCABD (deoCp1)   | metabolism; central intermediary metabolism; nucleotide and nucleoside conversions                                               |
| b0708 | <i>phr</i>  | -0.8 | -0.9 | -0.9 | -0.8 | deoxyribodipyrimidine photolyase                                                                                    | ybgA-phr (ybgAp1)  | Metabolism; building block biosynthesis; riboflavin (Vitamin B2), FAD, FMN, information transfer; DNA related; DNA repair        |
| b3401 | <i>hslO</i> | -0.8 | -0.7 | -0.8 | -0.9 | heat shock protein Hsp33                                                                                            | hslR-hslO (hslRp)  | Information transfer; protein related; chaperoning, folding                                                                      |
| b2415 | <i>ptsH</i> | -0.9 | -0.6 | -0.8 | -0.9 | phosphohistidinoprotein-hexose phosphotransferase component of PTS system (Hpr)                                     | ptsHI-crr (ptsHp1) | metabolism; carbon utilization; Group Translocators; The Phosphotransferase System HPr (HPr) Family, transport; substrate; sugar |
| b3919 | <i>tpiA</i> | -0.9 | -0.9 | -1.0 | -1.1 | triosephosphate isomerase                                                                                           | tpiA               | metabolism; energy metabolism, carbon; glycolysis                                                                                |

|       |             |      |      |      |      |                                                           |                    |                                                                                                                                         |
|-------|-------------|------|------|------|------|-----------------------------------------------------------|--------------------|-----------------------------------------------------------------------------------------------------------------------------------------|
| b1380 | <i>ldhA</i> | -1.0 | -0.8 | -0.8 | -1.0 | fermentative D-lactate dehydrogenase, NAD-dependent       | ldhA               | metabolism; energy metabolism, carbon; fermentation                                                                                     |
| b4383 | <i>deoB</i> | -1.1 | -1.2 | -1.2 | -1.1 | phosphopentom utase                                       | deoCABD (deoCp1)   | metabolism; central intermediary metabolism; nucleotide and nucleoside conversions                                                      |
| b0903 | <i>pflB</i> | -0.6 | -0.9 | -1.1 | -1.1 | pyruvate formate lyase I                                  | focA-pflB (focAp1) | metabolism; energy metabolism, carbon; anaerobic respiration, carbon utilization; central intermediary metabolism; threonine catabolism |
| b1039 | <i>csgE</i> | -1.0 | -0.8 | -1.5 | -1.4 | predicted transport protein                               | csgDEFG (csgDp2)   | transport; Transporters of Unknown Classification; Putative uncharacterized transport protein, cell structure; pilus,curli              |
| b1957 | <i>yodC</i> | -1.0 | -0.9 | -1.4 | -1.2 | predicted protein                                         | yodC               |                                                                                                                                         |
| b0904 | <i>focA</i> | -1.0 | -0.7 | -1.4 | -1.2 | formate transporter                                       | focA-pflB (focAp1) | metabolism; carbon utilization; transport; The Formate-Nitrite Transporter (FNT) Family                                                 |
| b2687 | <i>luxS</i> | -1.1 | -0.8 | -1.3 | -1.2 | S-ribosylhomocysteine lyase                               | luxS               | regulation; transcriptional level; complex regulation; quorum sensing                                                                   |
| b3024 | <i>ygiW</i> | -1.1 | -0.8 | -1.3 | -1.2 | conserved protein                                         | ygiW               |                                                                                                                                         |
| b2779 | <i>eno</i>  | -1.0 | -1.0 | -1.2 | -1.4 | enolase                                                   | eno-pyrG (pyrGp)   | metabolism; energy metabolism, carbon; glycolysis; anaerobic respiration; gluconeogenesis                                               |
| b1795 | <i>yeaQ</i> | -1.1 | -0.9 | -1.1 | -1.1 | conserved inner membrane protein                          | yeaQ               |                                                                                                                                         |
| b0707 | <i>ybgA</i> | -1.2 | -0.7 | -1.2 | -1.0 | conserved protein                                         | ybgA-phr (ybgAp1)  |                                                                                                                                         |
| b3336 | <i>bfr</i>  | -1.1 | -0.7 | -1.1 | -1.0 | bacterioferritin, iron storage and detoxification protein | bfd-bfr            | Cell processes; adaptation to stress; Fe aquisition                                                                                     |
| b0965 | <i>yccU</i> | -0.9 | -0.6 | -1.3 | -1.0 | predicted CoA-binding protein                             | yccU               |                                                                                                                                         |
| b2417 | <i>crr</i>  | -0.9 | -0.5 | -1.1 | -1.1 | glucose-specific enzyme IIA component of PTS              | ptsHI-crr (ptsHp1) | metabolism; carbon utilization; The PTS Fructose-Mannitol (Fru) Family, transport; substrate; D-glucose/trehalose                       |
