# Supplementary material for: E Unibus Plurum: Genomic Analysis of an Experimentally Evolved Polymorphism in Escherichia coli
Source: PubMed Central journal article supplement (PMC2763269; doi:10.1371/journal.pgen.1000713), 2009-11-06
Supplement: pgen.1000713.s006.pdf [file pgen.1000713.s006.pdf]

**Supplementary Table 2.** Top 91 significant genes by 4-class SAM for evolved isolates grown individually.

| ID    | Gene        | mean log <sub>2</sub> CV101 /JA122 | mean log <sub>2</sub> CV101 /JA122 | mean log <sub>2</sub> CV101 /JA122 | mean log <sub>2</sub> CV101 /JA122 | Gene product                                                                                  | Transcription unit              | MultiFun description                                                                                                                                                                                                                         |
|-------|-------------|------------------------------------|------------------------------------|------------------------------------|------------------------------------|-----------------------------------------------------------------------------------------------|---------------------------------|----------------------------------------------------------------------------------------------------------------------------------------------------------------------------------------------------------------------------------------------|
| b4484 | <i>cpxP</i> | 0.0                                | 1.7                                | -0.8                               | 0.0                                | regulator of Cpx response; possible chaperone involved in extra-cytoplasmic stress resistance | cpxP                            | Cell processes; adaptations; regulation; 2-component regulatory system                                                                                                                                                                       |
| b1874 | <i>cutC</i> | -0.4                               | 1.8                                | -1.0                               | -0.6                               | copper homeostasis protein                                                                    | cutC                            | Cell processes; protection; detoxification (xenobiotic metabolism)                                                                                                                                                                           |
| b1552 | <i>cspI</i> | 0.0                                | 0.8                                | -0.1                               | -0.2                               | Qin prophage; cold shock protein                                                              | cspI                            | Prophage genes and phage related functions; extrachromosomal                                                                                                                                                                                 |
| b2630 | <i>yfjN</i> | -0.4                               | 0.8                                | 0.0                                | -0.1                               | CP4-57 prophage; RNase LS                                                                     | rnlA-yfjO                       | Prophage genes and phage related functions; extrachromosomal                                                                                                                                                                                 |
| b4170 | <i>mutL</i> | 0.0                                | 0.8                                | 0.1                                | 0.0                                | methyl-directed mismatch repair protein                                                       | yjeFE-amiB-mutL-miaA-hfq-hfIXKC | Information transfer; DNA repair                                                                                                                                                                                                             |
| b4171 | <i>miaA</i> | -0.3                               | 1.0                                | 0.1                                | -0.4                               | δ-(2)-iso-pentenylpyrophosphate tRNA-adenosine transferase                                    | yjeFE-amiB-mutL-miaA-hfq-hfIXKC | Information transfer; RNA related; RNA modification                                                                                                                                                                                          |
| b2597 | <i>raiA</i> | -0.3                               | 1.8                                | 0.3                                | 0.0                                | cold shock protein associated with 30S ribosomal subunit                                      | raiA                            | Information transfer; protein related; translation, cell structure; ribosome; cold-shock protein                                                                                                                                             |
| b1463 | <i>nhoA</i> | -0.2                               | -2.0                               | -0.3                               | -0.3                               | N-hydroxyarylamine O-acetyltransferase                                                        | nhoA                            | Metabolism                                                                                                                                                                                                                                   |
| b1466 | <i>narW</i> | -0.5                               | -2.8                               | -1.1                               | -1.5                               | nitrate reductase 2 (NRZ), δ - subunit (assembly subunit)                                     | narZYWV                         | Metabolism; Anaerobic respiration C & energy metabolism; information transfer; protein related; chaperoning, folding                                                                                                                         |
| b1467 | <i>narY</i> | -0.9                               | -3.0                               | -1.3                               | -1.5                               | nitrate reductase 2 (NRZ), β - subunit                                                        | narZYWV                         | Metabolism; Anaerobic respiration energy production/transport; e <sup>-</sup> acceptor; carbon; cell structure; membrane                                                                                                                     |
| b0430 | <i>cyoC</i> | 0.4                                | -0.8                               | 1.2                                | 0.7                                | cytochrome o ubiquinol oxidase subunit III                                                    | cyoABCDE                        | Metabolism; Aerobic respiration; C & energy metabolism; energy production/transport; e <sup>-</sup> acceptor; Primary Active Transporters; Oxidoreduction-driven Active Transporters; H <sup>+</sup> -translocating Cytochrome Oxidase (COX) |
| b0431 | <i>cyoB</i> | 0.4                                | -1.1                               | 0.8                                | 0.6                                | cytochrome o ubiquinol oxidase subunit I                                                      | cyoABCDE                        | Metabolism; Aerobic metabolism; e <sup>-</sup> acceptor; C & energy metabolism; Primary Active Transporters; Oxidoreduction-driven Active Transporters; H <sup>+</sup> -translocating Cytochrome Oxidase (COX)                               |
| b0432 | <i>cyoA</i> | 0.3                                | -1.2                               | 0.7                                | 0.9                                | cytochrome o ubiquinol oxidase subunit II                                                     | cyoABCDE                        | Metabolism; Aerobic respiration; e <sup>-</sup> transport; C & energy metabolism; Primary Active Transporters; Oxidoreduction-driven Active Transporters; H <sup>+</sup> -translocating Cyt oxidase (COX)                                    |
| b0754 | <i>aroG</i> | 0.1                                | -1.5                               | 0.2                                | 0.2                                | 3-deoxy-D-arabino-heptulosonate-7-phosphate synthase, phenylalanine repressible               | aroG                            | Metabolism; Building block biosynthesis; amino acids; phenylalanine                                                                                                                                                                          |
| b1073 | <i>flgB</i> | 1.3                                | -1.1                               | 2.0                                | 0.7                                | flagellar component of cell-proximal portion of basal-body rod                                | flgBCDEFGHIJ                    | Metabolism; Biosynthesis; flagellum macromolecules (cellular constituent) cell processes; motility (incl.                                                                                                                                    |

|       |             |     |      |     |     |                                                                  |                     |                                                                                                                                                                                                                    |
|-------|-------------|-----|------|-----|-----|------------------------------------------------------------------|---------------------|--------------------------------------------------------------------------------------------------------------------------------------------------------------------------------------------------------------------|
|       |             |     |      |     |     |                                                                  |                     | chemotaxis, energytaxis, aerotaxis, redoxaxis), cell structure;                                                                                                                                                    |
| b1074 | <i>flgC</i> | 1.3 | -1.0 | 1.9 | 0.6 | flagellar component of cell-proximal portion of basal-body rod   | flgBCDEFGHIJ        | Metabolism; Biosynthesis; <u>flagellum</u> macromolecules (cellular constituent), cell processes; motility (incl. chemotaxis, energytaxis, aerotaxis, redoxaxis), cell structure                                   |
| b1075 | <i>flgD</i> | 1.5 | -1.4 | 2.0 | 0.7 | flagellar hook assembly protein                                  | flgBCDEFGHIJ        | Metabolism; Biosynthesis; <u>flagellum</u> macromolecules (cellular constituent); cell processes; motility (incl. chemotaxis, energytaxis, aerotaxis, redoxaxis), cell structure;                                  |
| b1076 | <i>flgE</i> | 1.3 | -1.5 | 2.0 | 0.7 | flagellar hook protein                                           | flgBCDEFGHIJ        | Metabolism; Biosynthesis; <u>flagellum</u> macromolecules (cellular constituent); cell processes; motility (incl. chemotaxis, energytaxis, aerotaxis, redoxaxis), cell structure;                                  |
| b1077 | <i>flgF</i> | 1.1 | -1.1 | 1.4 | 0.5 | flagellar component of cell-proximal portion of basal-body rod   | flgBCDEFGHIJ        | Metabolism; Biosynthesis; <u>flagellum</u> macromolecules (cellular constituent); cell processes; motility (incl. chemotaxis, energytaxis, aerotaxis, redoxaxis), cell structure;                                  |
| b1078 | <i>flgG</i> | 1.3 | -1.0 | 1.5 | 0.7 | flagellar component of cell-distal portion of basal-body rod     | flgBCDEFGHIJ        | Metabolism; Biosynthesis; <u>flagellum</u> macromolecules (cellular constituent), cell processes; motility (incl. chemotaxis, energytaxis, aerotaxis, redoxaxis), cell structure;                                  |
| b1079 | <i>flgH</i> | 1.1 | -0.7 | 1.3 | 0.6 | flagellar protein of basal-body outer-membrane L ring            | flgBCDEFGHIJ        | Metabolism; Biosynthesis; <u>flagellum</u> macromolecules (cellular constituent), cell processes; motility (incl. chemotaxis, energytaxis, aerotaxis, redoxaxis), cell structure; membrane, cell structure;        |
| b1941 | <i>fliI</i> | 1.7 | -0.6 | 2.0 | 0.7 | flagellum-specific ATP synthase                                  | fliFGHIJK (fliFp)   | Metabolism; Biosynthesis; <u>flagellum</u> ; C & energy metabolism; ATP-H <sup>+</sup> motive force interconversion, cell structure                                                                                |
| b1944 | <i>fliL</i> | 0.9 | -0.3 | 1.2 | 0.3 | flagellar biosynthesis protein                                   | fliLMNOPQR (fliLp1) | Metabolism; Biosynthesis; <u>flagellum</u> macromolecules (cellular constituent); cell processes; motility (incl. chemotaxis, energytaxis, aerotaxis, redoxaxis), cell structure;                                  |
| b1945 | <i>fliM</i> | 1.6 | -0.6 | 1.6 | 1.4 | flagellar motor switching and energizing component               | fliLMNOPQR (fliLp1) | Metabolism; Biosynthesis; <u>flagellum</u> macromolecules (cellular constituent), cell processes; motility (incl. chemotaxis, energytaxis, aerotaxis, redoxaxis), cell structure;                                  |
| b2553 | <i>glnB</i> | 0.2 | -0.6 | 0.5 | 0.2 | regulatory protein P-II for glutamine synthetase                 | glnB                | Metabolism; Building block biosynthesis; <u>amino acids</u> ; glutamine, information transfer; RNA related; transcriptional, regulation; <u>post-transcriptional regulation</u> ; inhibition/activation of enzymes |
| b2378 | <i>lpxP</i> | 0.6 | 2.2  | 0.8 | 0.4 | palmitoleyl-acyl carrier protein (ACP)-dependent acyltransferase | lpxP                | Metabolism; Biosynthesis; <u>lipopolysaccharide</u> ; macromolecules (cellular constituent) lipid A, cell processes; adaptation                                                                                    |

|       |             |      |      |      |      |                                                                                         |           |                                                                                                                                                                                                                                                  |
|-------|-------------|------|------|------|------|-----------------------------------------------------------------------------------------|-----------|--------------------------------------------------------------------------------------------------------------------------------------------------------------------------------------------------------------------------------------------------|
|       |             |      |      |      |      |                                                                                         |           | to thermal stress; cell structure; membrane, cell structure; surface antigens (ECA, O antigen of LPS)                                                                                                                                            |
| b0750 | <i>nadA</i> | -0.5 | -1.9 | -0.9 | -0.8 | quinolinate synthase, subunit A                                                         | nadA-pnuC | Metabolism; Building block biosynthesis; <u>NAD<sup>+</sup> carrier</u>                                                                                                                                                                          |
| b2476 | <i>purC</i> | 0.0  | -1.5 | -0.5 | 0.1  | phosphoribosylaminoimidazole-succinocarboxamide synthetase                              | purC      | Metabolism; Building block biosynthesis; <u>purine biosynthesis</u>                                                                                                                                                                              |
| b0494 | <i>tesA</i> | 0.0  | 1.1  | 0.1  | -0.1 | multifunctional acyl-CoA thioesterase I and protease I and lysophospholipase L1         | tesA      | Metabolism; Building block biosynthesis; <u>fatty acid &amp; phosphatidic acid</u>                                                                                                                                                               |
| b4069 | <i>acs</i>  | 3.9  | 0.0  | -1.5 | -0.3 | acetyl-CoA synthetase                                                                   | acs-yjCHG | Metabolism; Building Block Biosynthesis; fatty acid and phosphatidic acid metabolism; acetate utilization; central intermediary metabolism;                                                                                                      |
| b1896 | <i>otsA</i> | -2.4 | -0.7 | -2.6 | -2.4 | trehalose-6-phosphate synthase                                                          | otsBA     | Metabolism; central intermediary metabolism; glucose metabolism, cell processes; osmotic stress adaptation;                                                                                                                                      |
| b1702 | <i>pps</i>  | 0.0  | -1.8 | 0.3  | 0.6  | phosphoenolpyruvate synthase                                                            | pps       | Metabolism; gluconeogenesis central intermediary metabolism                                                                                                                                                                                      |
| b2091 | <i>gatD</i> | 1.8  | -0.5 | 1.3  | 0.8  | galactitol-1-phosphate dehydrogenase, Zn-dependent and NAD(P)-binding                   | gatYZABCD | Metabolism; C utilization; <u>galactitol</u>                                                                                                                                                                                                     |
| b2095 | <i>gatZ</i> | 2.0  | -1.2 | 1.6  | 1.3  | D-tagatose 1,6-bisphosphate aldolase 2, subunit                                         | gatYZABCD | Metabolism; C utilization; <u>tagatose</u>                                                                                                                                                                                                       |
| b2096 | <i>gatY</i> | 1.8  | -1.4 | 1.2  | 1.0  | D-tagatose 1,6-bisphosphate aldolase 2, catalytic subunit                               | gatYZABCD | Metabolism; C utilization; <u>tagatose</u>                                                                                                                                                                                                       |
| b0161 | <i>degP</i> | -0.4 | 1.9  | -1.1 | -0.9 | serine endoprotease (protease Do), membrane-associated                                  | degP      | Metabolism; MacroMolecule Degradation; proteins/peptides/ glycopeptides, cell processes; adaptation to thermal stress;                                                                                                                           |
| b1844 | <i>exoX</i> | 0.0  | 1.1  | 0.3  | 0.2  | DNA exonuclease X                                                                       | exoX-yobB | Metabolism; macromolecule degradation; information transfer; <u>DNA repair, DNA degradation</u>                                                                                                                                                  |
| b2193 | <i>narP</i> | -0.1 | 1.1  | 0.0  | -0.1 | DNA-binding response regulator in 2-component regulatory system with NarQ or NarX       | narP      | Transcriptional Regulation; Information Transfer; <u>Transcriptional activator/repressor</u> ; C & energy metabolism; anaerobic respiration; RNA related;                                                                                        |
| b3461 | <i>rpoH</i> | -0.2 | 0.8  | -0.5 | -0.7 | RNA polymerase, $\sigma^{32}$ ( $\sigma^H$ ) factor                                     | rpoH      | Information transfer; Transcriptional Regulation; RNA related; $\square$ factors, anti- $\square$ -factors; stimulon, cell processes; adaptation to stress; temperature extremes                                                                 |
| b1663 | <i>mdtK</i> | -0.5 | 0.4  | -0.4 | -0.4 | multidrug efflux system transporter                                                     | mdtK      | Transport; Multi Antimicrobial Extrusion (MATE) Family; <u>Electrochemical potential driven transporters</u> ; Porters (Uni-, Sym- and Antiporters); cell processes; cell structure; protection; drug resistance/sensitivity, membrane           |
| b0929 | <i>ompF</i> | 1.2  | -1.7 | 1.3  | 0.0  | outer membrane porin 1a (Ia;b;F)                                                        | ompF      | Transport; $\square$ -barrel porins (Outer Membrane Porin (OMP) Functional Superfamily); <u>Solute:Sodium Symporter (SSS) Family</u> ; Channel-type Transporters; General Bacterial Porin (GBP) Family, cell structure; hydrophilic molecule     |
| b3540 | <i>dppF</i> | 0.1  | 1.6  | 1.1  | 1.0  | dipeptide transporter; ATP-binding component of ABC superfamily                         | dppABCDF  | Primary Active Transporters; ATP-binding Cassette (ABC) Superfamily + ABC-type Uptake Permeases; C utilization; <u>amino acid transport</u> ; PP <sub>i</sub> Bond (ATP, GTP, P <sub>2</sub> ) Hydrolysis-driven Active Transporters; Metabolism |
| b3454 | <i>livF</i> | 0.1  | -0.1 | 0.6  | -1.5 | leucine/isoleucine/valine transporter subunit; ATP-binding component of ABC superfamily | livKHMFGF | Primary Active Transporters; Building block biosynthesis: (isoleucine/valine/leucine); amino acid                                                                                                                                                |

|       |               |      |      |      |      |                                                                                         |                   |                                                                                                                                                                                                                               |
|-------|---------------|------|------|------|------|-----------------------------------------------------------------------------------------|-------------------|-------------------------------------------------------------------------------------------------------------------------------------------------------------------------------------------------------------------------------|
|       |               |      |      |      |      |                                                                                         |                   | transport/metabolism); PP; Bond (ATP, GTP, P); ATP-binding Cassette (ABC) Superfamily + ABC-type                                                                                                                              |
| b3455 | <i>livG</i>   | 0.1  | -0.3 | 0.6  | -1.6 | leucine/isoleucine/valine transporter subunit; ATP-binding component of ABC superfamily | livKHMGF          | Primary Active Transporters; building block biosynthesis: (isoleucine/valine/leucine); amino acid metabolism; PP; Bond (ATP, GTP, P), ATP-binding Cassette (ABC) Superfamily + ABC-type                                       |
| b1017 | <i>efeU_2</i> | 0.4  | -0.9 | 0.6  | 1.1  | C-terminal fragment of ferrous iron permease (pseudogene)                               | efeBO             | Transporter pseudogene                                                                                                                                                                                                        |
| b1018 | <i>efeO</i>   | 0.2  | -0.6 | 0.7  | 0.9  | component of a tripartite ferrous iron transporter                                      | efeBO             | Transport                                                                                                                                                                                                                     |
| b3915 | <i>fieF</i>   | -0.3 | 0.6  | -0.1 | -0.2 | zinc transporter                                                                        | fieF              | Transport; Cation Diffusion Facilitator (CDF) Family; <u>Electro-chemical potential driven transporters</u> ; Porters (Uni-, Sym- and Antiporters); cell structure; membrane                                                  |
| b0763 | <i>modA</i>   | 0.2  | 1.7  | -0.4 | -0.6 | molybdate transporter subunit; periplasmic-binding component of ABC superfamily         | modABC            | Primary Active Transporters; Metabolism; Building Block Biosynthesis; cofactor, small molecule carrier (Mo); PPi Bond (ATP, GTP, P2) Hydrolysis-driven Active Transporters; ATP-binding Cassette (ABC) Superfamily + ABC-type |
| b0764 | <i>modB</i>   | 0.5  | 1.2  | 0.0  | -0.1 | molybdate transporter subunit; membrane component of ABC superfamily                    | modABC (modAp1)   | Transport; ATP-binding Cassette (ABC) Superfamily + ABC-type Uptake Permeases; Primary Active Transporters; PP; Bond (ATP, GTP, P2) Hydrolysis-driven Active Transporters; membrane component, cell structure;                |
| b1469 | <i>narU</i>   | -1.3 | -4.7 | -1.1 | -1.9 | nitrate/nitrite transporter                                                             | narU              | Transport; <u>Major Facilitator Superfamily (MFS)</u> ; N metabolism; Electrochemical potential driven; Porters (Uni-, Sym-, Anti-porters); cell structure; membrane;                                                         |
| b4067 | <i>actP</i>   | 5.1  | -0.2 | -0.1 | -0.3 | acetate permease                                                                        | acs-yjcHG (acsp1) | Transport; <u>Electrochemical potential driven transporters</u> ; Porters (Uni-, Sym-, Anti-porters); cell structure; membrane                                                                                                |
| b2092 | <i>gatC</i>   | 1.6  | -1.7 | 1.1  | 0.4  | galactitol-specific enzyme IIC component of PTS                                         | gatYZABCD (gatYp) | Transport; (PEP-dependent PTS) <u>C utilization</u> ; Group Translocators; Phosphotransferase Systems: PTS <u>Galactitol (Gat) Family</u> , cell structure; membrane; Metabolism;                                             |
| b2093 | <i>gatB</i>   | 1.7  | -1.4 | 1.3  | 0.7  | galactitol-specific enzyme IIB component of PTS                                         | gatYZABCD (gatYp) | Transport; (PEP-dependent PTS) <u>C utilization</u> ; Group Translocators; Phosphotransferase Systems: PTS <u>Galactitol (Gat) Family</u> , cell structure; membrane; Metabolism                                              |
| b2094 | <i>gatA</i>   | 2.0  | -1.5 | 1.5  | 1.0  | galactitol-specific enzyme IIA component of PTS                                         | gatYZABCD (gatYp) | Transport; (PEP-dependent PTS) <u>C utilization</u> ; Group Translocators; Phosphotransferase Systems: PTS <u>Galactitol (Gat) Family</u> , cell structure; membrane; Metabolism                                              |
| b3453 | <i>ugpB</i>   | -0.9 | 1.6  | -0.4 | -0.4 | periplasmic-binding component of an ABC superfamily glycerol-3-phosphate transporter    | ugpBAECQ          | Transport; Building block biosynthesis; <u>fatty acid/ phosphatidic acid metabolism</u> ; C & energy metabolism; aerobic and anaerobic respiration; central intermediary metabolism;                                          |

|       |             |      |      |      |      |                                                                         |                   |                                                                                                                                                                                                                     |
|-------|-------------|------|------|------|------|-------------------------------------------------------------------------|-------------------|---------------------------------------------------------------------------------------------------------------------------------------------------------------------------------------------------------------------|
|       |             |      |      |      |      |                                                                         |                   | glycerol.                                                                                                                                                                                                           |
| b4482 | <i>yigE</i> | -0.1 | 2.4  | -0.5 | -0.5 | predicted protein                                                       | yigE              |                                                                                                                                                                                                                     |
| b1829 | <i>htpX</i> | 0.1  | 1.8  | 0.1  | 0.0  | predicted endopeptidase                                                 | htpX              | Cell processes; adaptation to thermal stress; cell structure                                                                                                                                                        |
| b3055 | <i>htrG</i> | -0.4 | 0.9  | -0.5 | -0.6 | predicted signal transduction protein (SH3 domain)                      | htrG-cca (htrGp2) | Cell Structure; membrane                                                                                                                                                                                            |
| b1113 | <i>ycfS</i> | 0.2  | 1.2  | -0.3 | -0.6 | conserved protein                                                       | ycfS              | Cell wall remodeling                                                                                                                                                                                                |
| b1255 | <i>yciC</i> | 0.3  | 0.8  | -0.5 | 0.0  | predicted inner membrane protein                                        | yciC              | Cell Structure; membrane                                                                                                                                                                                            |
| b1473 | <i>yddG</i> | -0.2 | -1.2 | -0.2 | -0.3 | predicted methyl viologen efflux pump                                   | yddG              | Cell Structure; membrane                                                                                                                                                                                            |
| b1806 | <i>yeaY</i> | 0.2  | 1.5  | -0.3 | 0.0  | predicted lipoprotein                                                   | yeaZY (yeaZp)     | Cell Structure; membrane                                                                                                                                                                                            |
| b3471 | <i>yhhQ</i> | 0.0  | 2.3  | 0.2  | 0.0  | conserved inner membrane protein                                        | yhhQ              | Cell Structure; membrane                                                                                                                                                                                            |
| b3095 | <i>yqjA</i> | 0.0  | 2.0  | -0.3 | -0.4 | conserved inner membrane protein                                        | yqjAB (yqjAp1)    | Cell Structure; membrane                                                                                                                                                                                            |
| b1080 | <i>flgI</i> | 1.4  | -0.5 | 1.7  | 0.9  | predicted flagellar basal body protein                                  | flgBCDEFGHIJ      | Metabolism; Biosynthesis; flagellum; macromolecules (cellular constituent) cell processes; motility (incl. chemotaxis, energytaxis, aerotaxis, redoxaxis), cell structure;                                          |
| b1057 | <i>yceJ</i> | -0.2 | 0.7  | -0.3 | -0.4 | predicted cytochrome b561                                               | yceJ              | Metabolism; macromolecules (cellular constituent) biosynthesis; lg. molecule carriers; cytochromes                                                                                                                  |
| b2458 | <i>eutD</i> | 1.3  | -0.4 | 1.0  | 0.9  | predicted phosphotransacetylase subunit                                 | eutDMPQST         | Metabolism; C utilization; amines                                                                                                                                                                                   |
| b0925 | <i>ycbB</i> | -0.5 | 1.4  | -0.1 | -0.2 | predicted carboxypeptidase                                              | ycbB              | Metabolism; Macromolecule Degradation; <u>proteins/peptides/glycopeptides</u>                                                                                                                                       |
| b1477 | <i>yddM</i> | -0.7 | -1.9 | -0.5 | -0.5 | predicted DNA-binding transcriptional regulator                         | yddM              | Regulation; Transcriptional Regulation, cell processes; defense/survival                                                                                                                                            |
| b3082 | <i>ygjM</i> | 0.2  | 1.4  | -0.1 | -0.5 | predicted DNA-binding transcriptional regulator                         | ygjMN             | Regulation; Transcriptional Regulation;                                                                                                                                                                             |
| b0377 | <i>sbmA</i> | 0.3  | 1.5  | 0.2  | 0.0  | predicted transporter                                                   | sbmA-yaiW (sbmAp) | Transport; Primary Active Transporters; PP; bond (ATP, GTP, P2) Hydrolysis-driven Active Transporters;                                                                                                              |
| b0495 | <i>ybbA</i> | -0.1 | 1.0  | 0.1  | -0.1 | predicted transporter subunit: ATP-binding component of ABC superfamily | ybbA              | Transport; ATP-binding Cassette (ABC) Superfamily + ABC-type Uptake Permeases; Primary Active Transporters; PP; Bond (ATP, GTP, P2) Hydrolysis-driven Active Transporters; ATP binding <u>cytoplasmic component</u> |
| b0805 | <i>fiu</i>  | -0.1 | -1.4 | -0.7 | 0.8  | predicted iron outer membrane transporter                               | fiu               | Transport Fe acquisition, cell processes; adaptation to stress; cell structure; membrane                                                                                                                            |
| b1902 | <i>yecI</i> | 0.2  | 2.8  | 0.6  | 0.7  | predicted ferritin-like protein                                         | ftnB (ftnBp2)     | Transport; Fe acquisition; cell processes; adaptation to stress;                                                                                                                                                    |
| b4068 | <i>yjcH</i> | 5.4  | -0.2 | -0.1 | -0.3 | conserved inner membrane protein; acetate transport                     | acs-yjcHG (acsp2) |                                                                                                                                                                                                                     |
| b1843 | <i>yobB</i> | 0.0  | 1.9  | -0.1 | -0.2 | conserved protein                                                       | exoX-yobB         |                                                                                                                                                                                                                     |
| b0378 | <i>yaiW</i> | 0.0  | 1.2  | 0.2  | 0.1  | predicted DNA-binding transcriptional regulator                         | sbmA-yaiW (sbmAp) |                                                                                                                                                                                                                     |
| b1056 | <i>yceI</i> | 0.0  | 1.4  | -0.1 | -0.5 | secreted protein                                                        | yceI              |                                                                                                                                                                                                                     |
| b1254 | <i>yciB</i> | 0.2  | 0.8  | -0.4 | -0.1 | predicted inner membrane protein                                        | yciB              |                                                                                                                                                                                                                     |
| b1464 | <i>yddE</i> | -0.2 | -2.5 | -0.1 | -0.1 | conserved protein                                                       | yddE              |                                                                                                                                                                                                                     |
| b1535 | <i>ydeH</i> | -0.2 | 2.2  | -0.3 | -0.6 | conserved protein                                                       | ydeH              |                                                                                                                                                                                                                     |

|       |             |      |      |      |      |                                  |                |  |
|-------|-------------|------|------|------|------|----------------------------------|----------------|--|
| b1846 | <i>yebE</i> | 0.0  | 3.0  | -0.5 | 0.0  | conserved protein                | yebE           |  |
| b2602 | <i>yfiL</i> | -0.8 | 1.4  | -0.9 | -0.7 | predicted protein                | yfiL           |  |
| b1452 | <i>yncE</i> | 0.2  | -6.0 | -0.2 | 0.2  | conserved protein                | yncE           |  |
| b1436 | <i>yncJ</i> | 0.0  | 1.6  | 0.0  | 0.0  | predicted protein                | yncJ           |  |
| b3096 | <i>yqjB</i> | -0.3 | 1.7  | -0.5 | -0.8 | conserved protein                | yqjAB (yqjAp1) |  |
| b3097 | <i>yqjC</i> | -1.8 | 0.3  | -2.0 | -2.0 | conserved protein                | yqjCDEK        |  |
| b3098 | <i>yqjD</i> | -2.0 | -0.2 | -2.2 | -2.0 | conserved protein                | yqjCDEK        |  |
| b3099 | <i>yqjE</i> | -1.9 | -0.3 | -2.2 | -2.0 | conserved inner membrane protein | yqjCDEK        |  |
| b3207 | <i>yrbL</i> | -1.2 | 0.3  | -1.5 | -1.0 | predicted protein                | yrbL           |  |
| b4217 | <i>ytfK</i> | -0.5 | 0.7  | -0.4 | -0.4 | conserved protein                | ytfK           |  |
