# Supplementary material for: E Unibus Plurum: Genomic Analysis of an Experimentally Evolved Polymorphism in Escherichia coli
Source: PubMed Central journal article supplement (PMC2763269; doi:10.1371/journal.pgen.1000713), 2009-11-06
Supplement: pgen.1000713.s007.pdf [file pgen.1000713.s007.pdf]

**Supplementary Table 3. Sequencing primers**

| Name               | Sequence (5' → 3')        |
|--------------------|---------------------------|
| acsseqF            | ACCGTTACCGACTCGCATC       |
| acsseqI1           | TCGATACCTGGTGGCAGAC       |
| acsseqI2           | TGATGTGGTGGCGATTTATATG    |
| acsseqR            | GGAGCAGCCGTTTGTTCAG       |
| cyaF1              | TCGCCATCAACTTGTCTTTG      |
| cyaI1              | GCACTATCACCATCCGCTAA      |
| cyaI2              | TGGCAGCTCTACAAGAGTATCG    |
| cyaI3              | GTATAACCGCGCGCCAAA        |
| cyaI4              | GAAACCGGGCGTTTCAAG        |
| cyaR               | CAGGCGGGTAAAACAGTC        |
| glpKf              | CGCACGTTTCGGGACTAC        |
| glpKIf             | CGGAACCACATACACCCAT       |
| glpKr              | CGCTGTAATATGACTACGGGACA   |
| glpRf              | AATGACCGGATCGGCTA         |
| glpRr              | GGGTTAGCCGTGGGTTTAG       |
| lamBseqf           | TAAGCACCCACAAAACACA       |
| lamBseqr           | CTGCTGATAAACAGAGGACGAT    |
| malTf1             | AGGTTTCTGGCCGACCTTAT      |
| malTf2             | GAGCTGCCGGAATCCAC         |
| malTprom           | ACAACGTTATCGCTAGTTTGC     |
| malTr1             | CGACAGTTCGCTATGGTTGA      |
| malTr2             | CGGTGCGGTTTAGTTTGATA      |
| mglDf1             | TGATTGCCAGTGCCTTCAC       |
| mglDf2             | ATCACATTGTTAAGATACTGTGAAA |
| mglDI              | CCCCAGCAGTTCAACCATC       |
| mglDr              | GCTCTGGCGTCAGTTAACTTTG    |
| mIcF1 <sup>1</sup> | CTGAATGCTCTCAGGTGAGG      |
| mIcR1 <sup>1</sup> | CTCCACCGTTATGCTTCAC       |
| ptaLf              | CGGCGGTAACGAAAGAGG        |
| ptaLr              | GGCAGTCAGAGATTCGATCC      |
| ptaRf              | CCTGCAGAGCTTCAACCTG       |

|                     |                           |
|---------------------|---------------------------|
| ptaRr               | AAGGATTAATGCAAATTAAGAGAAT |
| ptsGLf              | CCCGTCTGTTTCACATCGAC      |
| ptsGLr              | CAAACGGTACCAGGCAAC        |
| ptsGRf              | TCTTACTGGCGTTGTGCTG       |
| ptsGRr              | ACCGGCACGTATCAATTC        |
| rpoSF1 <sup>2</sup> | CGGACCTTTATTGTGCACA       |
| rpoSI <sup>2</sup>  | CTGTTAACGGCCGAAGAAGA      |
| rpoSR1 <sup>2</sup> | TGATTACCTGAGTGCCTACG      |
| spoTLf              | GCCAGGAACAGCAAGAGC        |
| spoTLr              | TGCTCTTTATAAGCCCAGTGC     |
| spoTLr2             | CCTTCCGGTGTGAAAACGTA      |
| spoTRf              | CCAGTACTACCGCACAAATCC     |
| spoTRr              | CGCAGATGCGTGCATAAC        |
