# Supplementary material for: E Unibus Plurum: Genomic Analysis of an Experimentally Evolved Polymorphism in Escherichia coli
Source: PubMed Central journal article supplement (PMC2763269; doi:10.1371/journal.pgen.1000713), 2009-11-06
Supplement: pgen.1000713.s008.pdf [file pgen.1000713.s008.pdf]

**Supplementary Table 4.** Failed and low concentration PCR reactions

| <b>ID</b> | <b>gene name</b> | <b>PCR reaction status</b> | <b>gene product</b>                             |
|-----------|------------------|----------------------------|-------------------------------------------------|
| b0012     | htgA             | bad                        | heat shock protein HtgA                         |
| b0024     | yaaY             | bad                        | predicted protein                               |
| b0031     | dapB             | bad                        | dihydrodipicolinate reductase                   |
| b0037     | caiC             | bad                        | probable crotonobetaine/carnitine-CoA ligase    |
| b0062     | araA             | bad                        | L-arabinose isomerase                           |
| b0075     | leuL             | bad                        | leu operon leader peptide                       |
| b0080     | fruR             | bad                        | fructose repressor                              |
| b0083     | ftsL             | bad                        | cell division protein FtsL                      |
| b0089     | ftsW             | bad                        | cell division protein FtsW                      |
| b0131     | panD             | bad                        | aspartate 1-decarboxylase                       |
| b0144     | yadB             | bad                        | hypothetical protein                            |
| b0240     | crI              | bad                        | curlin genes transcriptional activator          |
| b0269     | yagF             | bad                        | CP4-6 prophage; predicted dehydratase           |
| b0270     | yagG             | bad                        | YagG GPH Transporter                            |
| b0271     | yagH             | bad                        | putative $\beta$ -xylosidase                    |
| b0276     | yagJ             | bad                        | CP4-6 prophage; predicted protein               |
| b0304     | ykgC             | bad                        | predicted oxidoreductase                        |
| b0319     | yahE             | bad                        | predicted protein                               |
| b0324     | yahJ             | bad                        | predicted deaminase                             |
| b0335     | prpE             | bad                        | predicted propionyl-CoA synthetase              |
| b0349     | mhpC             | bad                        | 2-hydroxy-6-ketono-2,4-dienedioate hydrolase    |
| b0375     | yaiV             | bad                        | predicted DNA-binding transcriptional regulator |
| b0400     | phoR             | bad                        | phosphate regulon sensor protein PhoR           |
| b0406     | tgt              | bad                        | tRNA-guanine transglycosylase                   |
| b0437     | clpP             | bad                        | ATP-dependent clp protease proteolytic subunit  |
| b0457     | ylaB             | bad                        | conserved inner membrane protein                |
| b0460     | hha              | bad                        | haemolysin expression modulating protein        |
| b0462     | acrB             | bad                        | acriflavin resistance protein B                 |
| b0465     | o1120            | bad                        | predicted protein                               |
| b0466     | ybaM             | bad                        | hypothetical protein                            |
| b0497     | rhsD             | bad                        | RhsD protein precursor                          |
| b0517     | f349             | bad                        | predicted protein                               |
| b0521     | ybcF             | bad                        | hypothetical protein                            |
| b0525     | ppiB             | bad                        | peptidyl-prolyl cis-trans isomerase B           |
| b0564     | appY             | bad                        | M5 polypeptide                                  |
| b0575     | ybdE             | bad                        | hypothetical protein                            |
| b0586     | entF             | bad                        | enterobactin synthetase component F             |

|       |       |     |                                                            |
|-------|-------|-----|------------------------------------------------------------|
| b0659 | ybeY  | bad | conserved protein                                          |
| b0663 | b0663 | bad | predicted ORF                                              |
| b0700 | rhcC  | bad | RhcC protein precursor                                     |
| b0703 | ybfO  | bad | conserved protein, rhs-like                                |
| b0717 | ybgP  | bad | putative chaperone                                         |
| b0779 | uvrB  | bad | excision nuclease ABC subunit B                            |
| b0841 | ybjG  | bad | undecaprenyl pyrophosphate phosphatase                     |
| b0890 | ftsK  | bad | cell division protein FtsK                                 |
| b0924 | mukB  | bad | cell division protein                                      |
| b0939 | ycbR  | bad | predicted periplasmic pilin chaperone                      |
| b1031 | b1031 | bad | predicted ORF                                              |
| b1084 | rne   | bad | ribonuclease E                                             |
| b1102 | fhuE  | bad | outer-membrane receptor for Fe(III)-coprogen               |
| b1117 | lolD  | bad | outer membrane-specific lipoprotein transporter subunit    |
| b1194 | ycgR  | bad | protein involved regulation of flagellar motility          |
| b1207 | prsA  | bad | ribose-phosphate pyrophosphokinase                         |
| b1229 | tpr   | bad | protamine-like protein                                     |
| b1242 | ycheE | bad | hypothetical protein                                       |
| b1250 | kch   | bad | putative potassium channel protein                         |
| b1252 | tonB  | bad | TonB protein                                               |
| b1265 | trpL  | bad | trp operon leader peptide                                  |
| b1270 | btuR  | bad | COB(I) alamin adenosyltransferase                          |
| b1378 | ydbK  | bad | putative pyruvate synthase                                 |
| b1387 | maoC  | bad | putative ring-cleavage enzyme of phenylacetate degradation |
| b1409 | ynbB  | bad | predicted CDP-diglyceride synthase                         |
| b1423 | ydcJ  | bad | conserved protein                                          |
| b1432 | b1432 | bad | putative virulence protein                                 |
| b1461 | ydcE  | bad | hypothetical protein                                       |
| b1487 | ddpA  | bad | subunit of YddO/YddP/YddQ/YddR/YddS ABC transporter        |
| b1489 | dos   | bad | cAMP phosphodiesterase, heme-regulated                     |
| b1495 | yddb  | bad | predicted ORF                                              |
| b1496 | ydda  | bad | hypothetical ABC transporter in gadB 5' region             |
| b1510 | ydeK  | bad | hypothetical protein in hipA 5' region                     |
| b1513 | lsrA  | bad | fused AI2 transporter subunits of ABC superfamily          |
| b1514 | lsrC  | bad | LsrC , subunit of LsrA/LsrC/LsrD/LsrB ABC transporter      |
| b1595 | ynfL  | bad | predicted DNA-binding transcriptional regulator            |
| b1602 | pntB  | bad | pyridine nucleotide transhydrogenase subunit- beta         |
| b1617 | uidA  | bad | beta-D-glucuronidase                                       |
| b1619 | hdhA  | bad | 7-alpha-hydroxysteroid dehydrogenase                       |
| b1701 | ydiD  | bad | short chain acyl-CoA synthetase monomer                    |

|       |        |     |                                                           |
|-------|--------|-----|-----------------------------------------------------------|
| b1712 | himA   | bad | integration host factor alpha-subunit                     |
| b1715 | pheM   | bad | phenylalanyl-tRNA synthetase operon leader peptide        |
| b1770 | b1770  | bad | predicted DNA-binding transcriptional regulator           |
| b1786 | yeaJ   | bad | predicted diguanylate cyclase                             |
| b1815 | yoaD   | bad | predicted phosphodiesterase                               |
| b1816 | yoaE   | bad | predicted inner membrane protein                          |
| b1831 | yebJ   | bad | predicted structural transport element                    |
| b1837 | yebW   | bad | predicted protein                                         |
| b1845 | ptrB   | bad | protease II                                               |
| b1859 | yebI   | bad | hypothetical protein                                      |
| b1877 | yecT   | bad | predicted protein                                         |
| b1903 | b1903  | bad | phantom gene                                              |
| b1908 | yecA   | bad | conserved metal binding protein                           |
| b1928 | yedD   | bad | predicted protein                                         |
| b1934 | yedN   | bad | predicted protein, C-ter fragment                         |
| b1942 | fliJ   | bad | flagellar FliJ protein                                    |
| b1963 | yedR   | bad | predicted inner membrane protein                          |
| b1966 | yedS_3 | bad | predicted protein, C-ter fragment (pseudogene)            |
| b1976 | mtfA   | bad | conserved protein                                         |
| b1978 | yeeJ   | bad | adhesin                                                   |
| b1997 | insC-3 | bad | IS2 element protein InsA                                  |
| b2018 | hisL   | bad | his operon leader peptide                                 |
| b2118 | yehI   | bad | hypothetical protein                                      |
| b2318 | truA   | bad | pseudouridylylase I                                       |
| b2360 | yfdQ   | bad | CPS-53 (KpLE1) prophage; predicted protein                |
| b2420 | yfeS   | bad | conserved protein                                         |
| b2432 | yfeY   | bad | predicted protein                                         |
| b2457 | cchA   | bad | predicted protein                                         |
| b2459 | eutT   | bad | predicted cobalamine adenosyltransferase                  |
| b2463 | maeB   | bad | NADP-linked malic enzyme                                  |
| b2500 | purN   | bad | phosphoribosylglycinamide myltransferase                  |
| b2508 | guaB   | bad | inosine-5'-monophosphate dehydrogenase                    |
| b2520 | yfhM   | bad | conserved protein                                         |
| b2535 | csiE   | bad | stationary phase inducible protein CsiE                   |
| b2543 | yphA   | bad | predicted inner membrane protein                          |
| b2557 | purL   | bad | phosphoribosylformylglycineamide synthetase               |
| b2569 | lepA   | bad | GTP-binding protein LepA                                  |
| b2606 | rplS   | bad | 50S ribosomal subunit protein L19                         |
| b2647 | ypjA   | bad | adhesin-like autotransporter                              |
| b2751 | cysN   | bad | ATP sulfurylase (ATP:sulfate adenylyltransferase) subunit |

|       |      |     |                                                                       |
|-------|------|-----|-----------------------------------------------------------------------|
| b2752 | cysD | bad | ATP sulfurylase (ATP:sulfate adenytransferase)                        |
| b2761 | ygcB | bad | hypothetical protein in cysH 3' region                                |
| b2765 | ygcM | bad | 6-pyruvoyl tetrahydropterin synthase                                  |
| b2837 | galR | bad | galactose operon repressor                                            |
| b2843 | kduI | bad | 5-keto-4-deoxyuronate isomerase                                       |
| b2852 | ygeH | bad | predicted transcriptional regulator                                   |
| b2869 | ygeV | bad | putative transcriptional regulator                                    |
| b2920 | ygfH | bad | propionyl-CoA:succinate CoA transferase                               |
| b3021 | ygiT | bad | predicted DNA-binding transcriptional regulator                       |
| b3033 | yqiB | bad | predicted dehydrogenase                                               |
| b3038 | ygiC | bad | predicted enzyme                                                      |
| b3050 | yqiJ | bad | putative oxidoreductase                                               |
| b3052 | rfaE | bad | fused heptose 7-phosphate kinase/heptose 1-phosphate adenytransferase |
| b3073 | ygjG | bad | probable ornithine aminotransferase                                   |
| b3102 | yqjG | bad | predicted S-transferase                                               |
| b3125 | yhaE | bad | tartronate semialdehyde reductase                                     |
| b3137 | agaY | bad | tagatose-bisphosphate aldolase agaY                                   |
| b3166 | truB | bad | tRNA pseudouridine 55 synthase                                        |
| b3168 | infB | bad | protein chain initiation factor 2                                     |
| b3181 | greA | bad | transcription elongation factor                                       |
| b3212 | gltB | bad | glutamate synthase (NADPH) large chain precursor                      |
| b3213 | gltD | bad | glutamate synthase (NADPH) small chain                                |
| b3220 | yhcG | bad | conserved protein                                                     |
| b3230 | rpsI | bad | 30S ribosomal subunit protein S9                                      |
| b3297 | rpsK | bad | 30S ribosomal subunit protein S11                                     |
| b3310 | rplN | bad | 50S ribosomal subunit protein L14                                     |
| b3312 | rpmC | bad | 50S ribosomal subunit protein L29                                     |
| b3331 | yheI | bad | putative general secretion pathway protein j precursor                |
| b3338 | yheB | bad | endochitinase                                                         |
| b3378 | yhfU | bad | predicted protein                                                     |
| b3384 | trpS | bad | tryptophanyl tRNA synthetase                                          |
| b3449 | ugpQ | bad | glycerophosphoryl diester phosphodiesterase                           |
| b3482 | rhsB | bad | RhsB core protein with unique extension                               |
| b3488 | yhiJ | bad | predicted protein                                                     |
| b3489 | yhiK | bad | predicted protein                                                     |
| b3521 | yhjC | bad | predicted DNA-binding transcriptional regulator                       |
| b3593 | rhsA | bad | rhsa protein precursor                                                |
| b3606 | yibK | bad | predicted rRNA methylase                                              |
| b3612 | yibO | bad | putative 2,3-bisphosphoglycerate-independent phosphoglycerate         |
| b3643 | rph  | bad | RNase PH                                                              |

|       |        |                   |                                                                      |
|-------|--------|-------------------|----------------------------------------------------------------------|
| b3765 | yifB   | bad               | predicted ATP-dependent protease                                     |
| b3768 | ilvG_2 | bad               | acetolactate synthase II, large subunit, C-ter fragment (pseudogene) |
| b3772 | ilvA   | bad               | threonine deaminase; threonine dehydratase biosynthetic              |
| b3793 | rffT   | bad               | 4-alpha-L-fucosyltransferase                                         |
| b3826 | yigL   | bad               | sugar phosphatase                                                    |
| b3835 | ubiB   | bad               | 2-octaprenylphenol hydroxylase                                       |
| b3885 | yihX   | bad               | $\alpha$ -D-glucose-1-phosphatase                                    |
| b3942 | katG   | bad               | catalase hydroperoxidase I                                           |
| b3955 | yijP   | bad               | conserved inner membrane protein                                     |
| b4005 | purD   | bad               | phosphoribosylglycineamide synthetase                                |
| b4006 | purH   | bad               | phosphoribosylaminoimidazolecarboxamide formyltransferase            |
| b4034 | malE   | bad               | periplasmic maltose-binding protein                                  |
| b4066 | yjcF   | bad               | conserved protein                                                    |
| b4083 | yjcS   | bad               | predicted alkyl sulfatase                                            |
| b4099 | phnI   | bad               | phnI protein                                                         |
| b4114 | yjdB   | bad               | predicted metal-dependent hydrolase                                  |
| b4138 | dcuA   | bad               | anaerobic c4-dicarboxylate transporter dcuA                          |
| b4148 | sugE   | bad               | SugES                                                                |
| b4156 | yjeM   | bad               | YjeM APC transporter                                                 |
| b4177 | purA   | bad               | adenylosuccinate synthetase                                          |
| b4179 | vacB   | bad               | VacB protein                                                         |
| b4194 | yjfT   | bad               | subunit of L-ascorbate transporting phosphotransferase system        |
| b4199 | yjfY   | bad               | predicted protein                                                    |
| b4200 | rpsF   | bad               | 30S ribosomal subunit protein S6                                     |
| b4201 | priB   | bad               | primosomal replication protein n                                     |
| b4208 | cycA   | bad               | d-serine/d-alanine/glycine transporter                               |
| b4211 | ytfG   | bad               | NAD(P)H:quinone oxidoreductase                                       |
| b4215 | ytfL   | bad               | predicted protein                                                    |
| b4221 | ytfN   | bad               | conserved protein                                                    |
| b4222 | ytfP   | bad               | conserved protein                                                    |
| b4242 | mgtA   | bad               | Mg(2+) transport ATPase, P-type 1                                    |
| b4249 | yjgI   | bad               | predicted oxidoreductase                                             |
| b4256 | yjgM   | bad               | predicted acetyltransferase                                          |
| b4307 | yjhQ   | bad               | KpLE2 phage-like element; predicted acetyltransferase                |
| b4348 | hsdS   | bad               | type I restriction enzyme <i>ecoki</i> specificity protein (s protei |
| b0015 | dnaJ   | low concentration | DnaJ protein                                                         |
| b0495 | ybbA   | low concentration | hypothetical ABC transporter                                         |
| b1468 | narZ   | low concentration | respiratory nitrate reductase 2 alpha chain                          |
| b1687 | ydiJ   | low concentration | predicted FAD-linked oxidoreductase                                  |
| b1732 | katE   | low concentration | catalase HPII                                                        |

|       |      |                   |                                                    |
|-------|------|-------------------|----------------------------------------------------|
| b1823 | cspC | low concentration | cold shock-like protein CspC                       |
| b1916 | sdiA | low concentration | sdiA regulatory protein                            |
| b2145 | yeiS | low concentration | predicted inner membrane protein                   |
| b2392 | mntH | low concentration | MntH manganese ion NRAMP transporter               |
| b2666 | yqaE | low concentration | predicted membrane protein                         |
| b2791 | truC | low concentration | tRNA pseudouridine 65 synthase                     |
| b2866 | xdhA | low concentration | xanthine dehydrogenase, molybdenum binding subunit |
| b3016 | ygiQ | low concentration | conserved protein                                  |
| b4038 | yjbI | low concentration | conserved protein                                  |
| b4058 | uvrA | low concentration | excision nuclease                                  |
| b4068 | yjcH | low concentration | conserved inner membrane protein                   |
| b4121 | yjdF | low concentration | conserved inner membrane protein                   |
| b4193 | yjfS | low concentration | predicted protein                                  |
| b4206 | ytfB | low concentration | predicted cell envelope opacity-associated protein |
