# Supplementary material for: E Unibus Plurum: Genomic Analysis of an Experimentally Evolved Polymorphism in Escherichia coli
Source: PubMed Central journal article supplement (PMC2763269; doi:10.1371/journal.pgen.1000713), 2009-11-06
Supplement: pgen.1000713.s009.pdf [file pgen.1000713.s009.pdf]

**Supplementary Table 5. Primers used for qRT-PCR**

| Name       | Sequence (5' →3')                            |
|------------|----------------------------------------------|
| acsF       | TCGTCGCTGCGCATTCT                            |
| acsR       | CTCGTTGCCGATTTTTTCC                          |
| acs probe  | FAM 5' TTCCGTGGGCGAGCCAATT 3' BHQ            |
| flgBf      | GACGCCTCCTACCGCAGAA                          |
| flgBr      | CGTTCGCGATCCATATCGA                          |
| flgB probe | FAM 5' ATTCCGGACCAGCCTTCGC 3' BHQ            |
| lamB probe | FAM 5' CACAACAGAATGACTGGGAAGCTACCGATC 3' BHQ |
| lamBF      | CGACACTAACGTGGCCTATTCC                       |
| lamBR      | GCCATTGATCAGGTTTTTACC                        |
| mdaB probe | FAM 5' CATGATGTCCGCATCGTTCGCG 3' BHQ         |
| mdaBF      | GCACACTGCGCGACCTT                            |
| mdaBR      | ACTTCCGCTTTGACATCGTAGTC                      |
